# Supplementary material
Source: MDPI journal article supplement (https://www.mdpi.com/2072-4292/13/22/4696)
Supplement: s1 [file s1]

**Supplementary Table S1.** Summer aerial surveys, percentage of summer tracks, length of beach, density of tracks km<sup>-1</sup>; S1–S10 rankings were determined by number of tracks.

| Summer Survey Placenames                | Tracks | Percent Summer Tracks | Beach Length (m) | Density tracks km <sup>-1</sup> | Rank |
|-----------------------------------------|--------|-----------------------|------------------|---------------------------------|------|
| 80 Mile                                 | 4387   | 40.86%                | 212418           | 21                              | S1   |
| Lacepedes                               | 3910   | 36.42%                | 12650            | 309                             | S2   |
| Maret Island                            | 562    | 5.23%                 | 1625             | 346                             | S3   |
| Cassini                                 | 293    | 2.73%                 | 3327             | 88                              | S4   |
| Parry Island                            | 124    | 1.15%                 | 663              | 187                             | S5   |
| Oliver Island                           | 110    | 1.02%                 | 571              | 193                             | S6   |
| Bouganville Peninsula                   | 88     | 0.82%                 | 377              | 233                             | S7   |
| West Montalivet Island                  | 82     | 0.76%                 | 1197             | 68                              | S8   |
| Sir Graham Moore Island                 | 74     | 0.69%                 | 3966             | 19                              | S9   |
| Condillac Island                        | 73     | 0.68%                 | 987              | 74                              | S10  |
| East Montalivet Island                  | 65     | 0.61%                 | 754              | 86                              |      |
| Walker Island (Montalivet Islands)      | 63     | 0.59%                 | 342              | 184                             |      |
| S Cape Missiessy                        | 53     | 0.49%                 | 1000             | 53                              |      |
| S Cape Voltaire                         | 51     | 0.47%                 | 396              | 129                             |      |
| S Freshwater Cove                       | 48     | 0.45%                 | 856              | 56                              |      |
| Berthier Island                         | 38     | 0.35%                 | 652              | 58                              |      |
| N Cape Villaret                         | 37     | 0.34%                 | 13207            | 3                               |      |
| Froggart Island (NE of Fenelon Island)  | 36     | 0.34%                 | 86               | 417                             |      |
| Wiiluntju Island (N of Katers Island)   | 30     | 0.28%                 | 1190             | 25                              |      |
| SE of Hale Island                       | 27     | 0.25%                 | 406              | 67                              |      |
| Smokey Bay                              | 25     | 0.23%                 | 280              | 89                              |      |
| North Eclipse Island                    | 25     | 0.23%                 | 2703             | 9                               |      |
| Vansittart Bay                          | 22     | 0.20%                 | 2214             | 10                              |      |
| LaPlace Island                          | 21     | 0.20%                 | 169              | 124                             |      |
| Colbert Island                          | 21     | 0.20%                 | 1008             | 21                              |      |
| Anjo Peninsula                          | 21     | 0.20%                 | 6147             | 3                               |      |
| Prudhoe Island                          | 20     | 0.19%                 | 262              | 76                              |      |
| Low Island (Vansittart Bay)             | 20     | 0.19%                 | 770              | 26                              |      |
| No Name                                 | 19     | 0.18%                 | 200              | 95                              |      |
| Unnamed                                 | 17     | 0.16%                 | 200              | 85                              |      |
| Whitley Island                          | 15     | 0.14%                 | 241              | 62                              |      |
| Scorpion Island                         | 15     | 0.14%                 | 249              | 60                              |      |
| Middle Osborn Island                    | 15     | 0.14%                 | 503              | 30                              |      |
| Eclipse Island                          | 15     | 0.14%                 | 611              | 25                              |      |
| E High Bluff                            | 15     | 0.14%                 | 804              | 19                              |      |
| Albert Islands (Bonaparte Archipelago)  | 14     | 0.13%                 | 306              | 46                              |      |
| Carronade Island                        | 14     | 0.13%                 | 1264             | 11                              |      |
| Keraudren Island                        | 13     | 0.12%                 | 555              | 23                              |      |
| Turbin Island                           | 13     | 0.12%                 | 602              | 22                              |      |
| Mictyis Island                          | 12     | 0.11%                 | 121              | 99                              |      |
| Cape Bernier                            | 12     | 0.11%                 | 154              | 78                              |      |
| S Coulomb Point                         | 12     | 0.11%                 | 7617             | 2                               |      |
| Deception Bay                           | 11     | 0.10%                 | 58               | 191                             |      |
| W Bigge Island                          | 11     | 0.10%                 | 244              | 45                              |      |
| Descartes Island                        | 11     | 0.10%                 | 459              | 24                              |      |
| Entrance Island (NE of Augustus Island) | 10     | 0.09%                 | 177              | 56                              |      |

|                                         |       |       |       |    |
|-----------------------------------------|-------|-------|-------|----|
| S Cape Jaubert                          | 10    | 0.09% | 10125 | 1  |
| S Hardy Point                           | 9     | 0.08% | 464   | 19 |
| Hat Point                               | 9     | 0.08% | 1497  | 6  |
| Baudin Island (W of Fenelon Island)     | 8     | 0.07% | 245   | 33 |
| N Winyalkan Island                      | 8     | 0.07% | 311   | 26 |
| Cape Torrens                            | 8     | 0.07% | 898   | 9  |
| W De Grey River                         | 8     | 0.07% | 1044  | 8  |
| island S Cape Londonderry               | 7     | 0.07% | 200   | 35 |
| Unnamed island south-east of Red Island | 6     | 0.06% | 100   | 60 |
| Yankawingarri Island                    | 6     | 0.06% | 162   | 37 |
| Eclipse Hill Island                     | 5     | 0.05% | 656   | 8  |
| Cape Borda                              | 5     | 0.05% | 3613  | 1  |
| Laseron Island                          | 4     | 0.04% | 130   | 31 |
| S Chile Head                            | 4     | 0.04% | 200   | 20 |
| S Prior Point                           | 4     | 0.04% | 70    | 57 |
| E Sunday Island                         | 4     | 0.04% | 193   | 21 |
| Corvisart Island                        | 4     | 0.04% | 485   | 8  |
| West Governor Island                    | 4     | 0.04% | 564   | 7  |
| S James Price Point                     | 4     | 0.04% | 594   | 7  |
| N Cape Leveque                          | 4     | 0.04% | 5245  | 1  |
| Cape St Lambert (NW of Reveley Island)  | 4     | 0.04% | 5800  | 1  |
| S Cape Londonderry                      | 3     | 0.03% | 150   | 20 |
| Gaimard Island                          | 3     | 0.03% | 209   | 14 |
| Quoy Island                             | 3     | 0.03% | 233   | 13 |
| Hale Island                             | 3     | 0.03% | 699   | 4  |
| North Head                              | 2     | 0.02% | 100   | 20 |
| Mary Island                             | 2     | 0.02% | 740   | 3  |
| Solem Islands                           | 2     | 0.02% | 45    | 44 |
| Carlia Island                           | 2     | 0.02% | 124   | 16 |
| Poolngin Island                         | 2     | 0.02% | 129   | 16 |
| Coronation Island                       | 2     | 0.02% | 330   | 6  |
| Combe Hill Island                       | 2     | 0.02% | 340   | 6  |
| Fenelon Island                          | 2     | 0.02% | 343   | 6  |
| Bernoulli Island (SW of Waring Island)  | 2     | 0.02% | 612   | 3  |
| Cape Domett                             | 2     | 0.02% | 1897  | 1  |
| Steep Head Island                       | 1     | 0.01% | 70    | 14 |
| Fletcher Islands                        | 1     | 0.01% | 71    | 14 |
| Purrungki Island                        | 1     | 0.01% | 87    | 12 |
| Vulcan Island                           | 1     | 0.01% | 112   | 9  |
| S Raft Point                            | 1     | 0.01% | 132   | 8  |
| Galley Point                            | 1     | 0.01% | 163   | 6  |
| N Bigge Island                          | 1     | 0.01% | 216   | 5  |
| Katers Island                           | 1     | 0.01% | 220   | 5  |
| N of Kannamatju Island                  | 1     | 0.01% | 257   | 4  |
| Long Island                             | 1     | 0.01% | 957   | 1  |
| Total                                   | 10737 |       |       |    |

**Supplementary Table S2.** Winter aerial surveys, percentage of winter tracks, length of beach, density of tracks km<sup>-1</sup>; W1-W10 rankings were determined by number of tracks.

| Winter Survey Placenames       | Tracks | Percent Winter Tracks | Beach Length (m) | Density tracks km <sup>-1</sup> | Rank       |
|--------------------------------|--------|-----------------------|------------------|---------------------------------|------------|
| E Cape Domett                  | 1598   | 23.09%                | 1886             | 847                             | W1         |
| Maret Island                   | 333    | 4.81%                 | 2782             | 120                             | W2         |
| Cassini                        | 257    | 3.71%                 | 1736             | 148                             | W3         |
| Parry Island                   | 246    | 3.55%                 | 877              | 280                             | W4         |
| E Shakespeare Hill             | 164    | 2.37%                 | 13075            | 13                              | W5         |
| Southwest Osborn Island        | 161    | 2.33%                 | 1232             | 131                             | W6         |
| Coronation Island              | 155    | 2.24%                 | 1231             | 126                             | W7         |
| Keraudren Island               | 152    | 2.20%                 | 550              | 276                             | W8         |
| Kuntjuma Kutangari Island      | 146    | 2.11%                 | 628              | 233                             | W9         |
| <b>East Montalivet</b>         | 131    | 1.89%                 | 844              | 155                             | <b>W10</b> |
| Vulcan Island                  | 112    | 1.62%                 | 110              | 1017                            |            |
| N Maret Island                 | 99     | 1.43%                 | 1138             | 87                              |            |
| Oliver Island                  | 96     | 1.39%                 | 934              | 103                             |            |
| Middle Island, Lacepedes       | 96     | 1.39%                 | 2601             | 37                              |            |
| SE of Hale Island              | 89     | 1.29%                 | 202              | 440                             |            |
| SE Cape Londonderry            | 89     | 1.29%                 | 207              | 431                             |            |
| Jackson Island                 | 86     | 1.24%                 | 200              | 430                             |            |
| Hardy Point                    | 83     | 1.20%                 | 560              | 148                             |            |
| Racine Island                  | 78     | 1.13%                 | 482              | 162                             |            |
| N Valentine Island             | 74     | 1.07%                 | 2300             | 32                              |            |
| S Eagle Point                  | 73     | 1.05%                 | 762              | 96                              |            |
| Descartes Island               | 69     | 1.00%                 | 1024             | 67                              |            |
| Helpman Islands                | 64     | 0.92%                 | 190              | 338                             |            |
| Quoy Island                    | 60     | 0.87%                 | 232              | 258                             |            |
| NW of Heywood                  | 56     | 0.81%                 | 270              | 207                             |            |
| SE Gibson Point                | 56     | 0.81%                 | 1000             | 56                              |            |
| Middle Osborn Island           | 56     | 0.81%                 | 492              | 114                             |            |
| Turbin Island                  | 55     | 0.79%                 | 605              | 91                              |            |
| SW Gibson Point                | 53     | 0.77%                 | 1000             | 53                              |            |
| NW Low Island (Vansittart Bay) | 52     | 0.75%                 | 776              | 67                              |            |
| S Hardy Point                  | 51     | 0.74%                 | 464              | 110                             |            |
| S Augustus                     | 50     | 0.72%                 | 191              | 261                             |            |
| West Island, Lacepedes         | 50     | 0.72%                 | 3185             | 16                              |            |
| WNW of Heywood                 | 48     | 0.69%                 | 90               | 533                             |            |
| E of Caswell Island            | 48     | 0.69%                 | 80               | 598                             |            |
| Wiirra Island                  | 48     | 0.69%                 | 204              | 235                             |            |
| Fletcher Islands               | 48     | 0.69%                 | 310              | 155                             |            |
| S East Governor Islands        | 47     | 0.68%                 | 290              | 162                             |            |
| East Island, Lacepedes         | 46     | 0.66%                 | 281              | 164                             |            |
| Lafontaine Island              | 45     | 0.65%                 | 2050             | 22                              |            |
| Froggart Island                | 41     | 0.59%                 | 101              | 407                             |            |
| Entrance Island                | 40     | 0.58%                 | 758              | 53                              |            |
| Deception Bay                  | 39     | 0.56%                 | 58               | 675                             |            |
| Hedley Island                  | 38     | 0.55%                 | 269              | 141                             |            |
| E Bigge Island                 | 38     | 0.55%                 | 347              | 109                             |            |
| Hat Point                      | 37     | 0.53%                 | 234              | 158                             |            |
| Eclipse Hill Island            | 37     | 0.53%                 | 439              | 84                              |            |

|                                                      |    |       |      |     |
|------------------------------------------------------|----|-------|------|-----|
| NW Bigge Island                                      | 37 | 0.53% | 752  | 49  |
| Unnamed island                                       | 35 | 0.51% | 150  | 233 |
| Kartja Island                                        | 35 | 0.51% | 258  | 136 |
| Gale Island                                          | 35 | 0.51% | 304  | 115 |
| S Sir Graham Moore                                   | 34 | 0.49% | 487  | 70  |
| Boomerang Bay                                        | 31 | 0.45% | 795  | 39  |
| Heywood Island                                       | 29 | 0.42% | 453  | 64  |
| Cape Torrens                                         | 29 | 0.42% | 804  | 36  |
| Lagrange Island                                      | 29 | 0.42% | 2425 | 12  |
| Cape Bougainville                                    | 28 | 0.40% | 663  | 42  |
| Albert Islands                                       | 27 | 0.39% | 508  | 53  |
| Cape Voltaire                                        | 27 | 0.39% | 528  | 51  |
| S of Valentine Island                                | 26 | 0.38% | 3828 | 7   |
| Traverse Island                                      | 25 | 0.36% | 129  | 194 |
| Mably Island                                         | 25 | 0.36% | 228  | 110 |
| Smokey Bay                                           | 24 | 0.35% | 280  | 86  |
| Laplace Island                                       | 23 | 0.33% | 166  | 139 |
| SW Sir Graham Moore                                  | 22 | 0.32% | 2165 | 10  |
| East Helipad Island                                  | 20 | 0.29% | 153  | 131 |
| Colbert Island                                       | 20 | 0.29% | 298  | 67  |
| Katers Island                                        | 20 | 0.29% | 396  | 50  |
| Fenelon Island                                       | 20 | 0.29% | 1439 | 14  |
| W Bigge Island                                       | 19 | 0.27% | 287  | 66  |
| Malcolm Island                                       | 19 | 0.27% | 320  | 59  |
| S Freshwater Cove                                    | 19 | 0.27% | 1369 | 14  |
| E Combe Hill Island                                  | 17 | 0.25% | 150  | 113 |
| N Madarr                                             | 17 | 0.25% | 150  | 113 |
| SW Heywood                                           | 17 | 0.25% | 200  | 85  |
| Hecla Island                                         | 17 | 0.25% | 258  | 66  |
| N Freshwater Bay (Western side of Vansittart Bay)    | 17 | 0.25% | 822  | 21  |
| Prudhoe Island                                       | 16 | 0.23% | 262  | 61  |
| Laseron                                              | 16 | 0.23% | 271  | 59  |
| Slate Islands (Wailgwin Island)                      | 16 | 0.23% | 310  | 52  |
| Sandy Islet, Lacepedes                               | 16 | 0.23% | 662  | 24  |
| W Cape Brewster                                      | 16 | 0.23% | 804  | 20  |
| NW of Darcy Island                                   | 15 | 0.22% | 200  | 75  |
| Woninjabo Islands                                    | 15 | 0.22% | 135  | 112 |
| Gibson Point                                         | 15 | 0.22% | 2125 | 7   |
| SE Laseron                                           | 14 | 0.20% | 130  | 108 |
| Lulim Island (Slate Islands)                         | 14 | 0.20% | 156  | 90  |
| Point Torment (N of Mary Island N and Mary Island S) | 14 | 0.20% | 436  | 32  |
| Corvisart Island                                     | 14 | 0.20% | 485  | 29  |
| S Lesueur Island                                     | 14 | 0.20% | 967  | 14  |
| Condillac Island                                     | 14 | 0.20% | 987  | 14  |
| W Cape Domett                                        | 13 | 0.19% | 49   | 263 |
| E of Bigge Island                                    | 13 | 0.19% | 78   | 166 |
| Bush Camp Faraway Bay                                | 13 | 0.19% | 668  | 19  |
| S WG landing                                         | 12 | 0.17% | 200  | 60  |
| Treachery Head                                       | 12 | 0.17% | 200  | 60  |
| Woodward Island                                      | 12 | 0.17% | 186  | 65  |
| NE Bigge Island                                      | 12 | 0.17% | 285  | 42  |
| No Name                                              | 11 | 0.16% | 200  | 55  |

|                                         |    |       |      |     |
|-----------------------------------------|----|-------|------|-----|
| S WG launch                             | 10 | 0.14% | 150  | 67  |
| Yampi Sound                             | 10 | 0.14% | 269  | 37  |
| W Governor Island                       | 10 | 0.14% | 1436 | 7   |
| Wiiluntju Island (N of Katers Island)   | 9  | 0.13% | 851  | 11  |
| NE Darcy Island                         | 8  | 0.12% | 100  | 80  |
| Darcy Island                            | 8  | 0.12% | 116  | 69  |
| Jar Island                              | 8  | 0.12% | 240  | 33  |
| Deep Water Point                        | 8  | 0.12% | 275  | 29  |
| Cape Rulhieres                          | 8  | 0.12% | 299  | 27  |
| Borda Island                            | 8  | 0.12% | 311  | 26  |
| E Sir Graham Moore                      | 8  | 0.12% | 593  | 13  |
| W Crystal Head                          | 8  | 0.12% | 810  | 10  |
| NE Scorpion Island                      | 8  | 0.12% | 1213 | 7   |
| Cape Talbot                             | 8  | 0.12% | 3018 | 3   |
| Byam Martin                             | 6  | 0.09% | 133  | 45  |
| West Montalivet Island                  | 6  | 0.09% | 211  | 28  |
| Combe Hill Island                       | 6  | 0.09% | 333  | 18  |
| E Governor Island                       | 6  | 0.09% | 868  | 7   |
| Glycosmis Bay                           | 6  | 0.09% | 893  | 7   |
| N Freshwater Cove                       | 6  | 0.09% | 2688 | 2   |
| Truscott                                | 6  | 0.09% | 2937 | 2   |
| Anjo Peninsula                          | 6  | 0.09% | 5634 | 1   |
| Tjungkurakutangari Island               | 5  | 0.07% | 59   | 85  |
| S Cape Bougainville                     | 5  | 0.07% | 378  | 13  |
| Corneille Island                        | 5  | 0.07% | 464  | 11  |
| E Wollaston Island                      | 4  | 0.06% | 100  | 40  |
| Melomys Island                          | 4  | 0.06% | 100  | 40  |
| Unnamed                                 | 4  | 0.06% | 100  | 40  |
| Edeline Islands                         | 4  | 0.06% | 188  | 21  |
| Queen Island                            | 4  | 0.06% | 247  | 16  |
| Parry Harbour                           | 4  | 0.06% | 486  | 8   |
| Berthier Island                         | 4  | 0.06% | 500  | 8   |
| SE Low Island (Vansittart Bay)          | 4  | 0.06% | 598  | 7   |
| Lamarck Island                          | 4  | 0.06% | 618  | 6   |
| SW High Bluff                           | 4  | 0.06% | 1473 | 3   |
| W Drysdale R mouth                      | 4  | 0.06% | 3262 | 1   |
| SW Kingfisher                           | 3  | 0.04% | 244  | 12  |
| E Dempsey Island (near Cheriton Island) | 2  | 0.03% | 100  | 20  |
| Lucas Island                            | 2  | 0.03% | 100  | 20  |
| N Darcy Island                          | 2  | 0.03% | 100  | 20  |
| NE Long Island                          | 2  | 0.03% | 100  | 20  |
| W King Island Sound                     | 2  | 0.03% | 250  | 8   |
| Helpman East                            | 2  | 0.03% | 20   | 100 |
| High Island                             | 2  | 0.03% | 47   | 42  |
| SE Point Usborne                        | 2  | 0.03% | 61   | 33  |
| Eclipse Islands                         | 2  | 0.03% | 89   | 22  |
| S Lizard Island                         | 2  | 0.03% | 101  | 20  |
| Seaflower Bay                           | 2  | 0.03% | 112  | 18  |
| Moliere Island                          | 2  | 0.03% | 151  | 13  |
| E Katers Island                         | 2  | 0.03% | 165  | 12  |
| S Hat Point                             | 2  | 0.03% | 187  | 11  |
| Swan Island                             | 2  | 0.03% | 209  | 10  |

|                       |      |       |      |   |
|-----------------------|------|-------|------|---|
| Solem Island          | 2    | 0.03% | 376  | 5 |
| Sandy Island          | 2    | 0.03% | 747  | 3 |
| Goodenough Bay        | 2    | 0.03% | 1400 | 1 |
| Jones Island          | 2    | 0.03% | 1675 | 1 |
| N Eclipse Island      | 2    | 0.03% | 2151 | 1 |
| Cape Dussejour        | 2    | 0.03% | 2871 | 1 |
| inlet N Current Point | 1    | 0.01% | 200  | 5 |
| W Buckland Point      | 1    | 0.01% | 200  | 5 |
| S Cape Rulhieres      | 1    | 0.01% | 139  | 7 |
| E Cape Pond           | 1    | 0.01% | 176  | 6 |
| E Hall Point          | 1    | 0.01% | 178  | 6 |
| Rocky Cove            | 1    | 0.01% | 360  | 3 |
| S Wilson Point        | 1    | 0.01% | 496  | 2 |
| S of Steep Head       | 1    | 0.01% | 652  | 2 |
| W Stewart Islands     | 1    | 0.01% | 827  | 1 |
| Maddarr               | 1    | 0.01% | 965  | 1 |
| Total                 | 6921 |       |      |   |
